# Supplementary material
Source: publisher figshare collection journal article supplement (https://gsajournals.figshare.com/ndownloader/files/24740735)
Supplement: Supplementary file 1 [file 24740735]

**Table S3,** **Mutation rate estimates under several scenarios of allelic bias at *de novo* mutant sites in salt stressed mutation accumulation lines**

| **Predicted read freq.** | **mutation rate** | **CI lower** | **CI upper** | **Lines (Salt)** |
| --- | --- | --- | --- | --- |
| 0.5 | 1.26E-10 | 6.44E-11 | 2.37E-10 | L. minor (GPL7) |
|  | 9.25E-11 | 3.87E-11 | 2.01E-10 | S. polyrhiza (CC) |
|  | 6.63E-11 | 2.61E-11 | 1.50E-10 | S. polyrhiza (GP23) |
|  |  |  |  |  |
| 0.2 | 4.25E-10 | 2.17E-10 | 7.99E-10 | L. minor (GPL7) |
|  | 1.74E-10 | 7.28E-11 | 3.78E-10 | S. polyrhiza (CC) |
|  | 1.23E-10 | 4.83E-11 | 2.79E-10 | S. polyrhiza (GP23) |
|  |  |  |  |  |
| 0.1 | 3.29E-09 | 1.68E-09 | 6.18E-09 | L. minor (GPL7) |
|  | 7.47E-10 | 3.13E-10 | 1.63E-09 | S. polyrhiza (CC) |
|  | 5.00E-10 | 1.96E-10 | 1.13E-09 | S. polyrhiza (GP23) |
